# Supplementary material
Source: PubMed Central journal article supplement (PMC8013835)
Supplement: EMBJ-40-e106151-s006.pdf [file EMBJ-40-e106151-s006.pdf]

## **Appendix File**

### **Table of Contents**

Page 2 to 17: Appendix Figure S1 to S9

Page 18 to 25: Appendix Table S1 and S2

## Appendix Figures

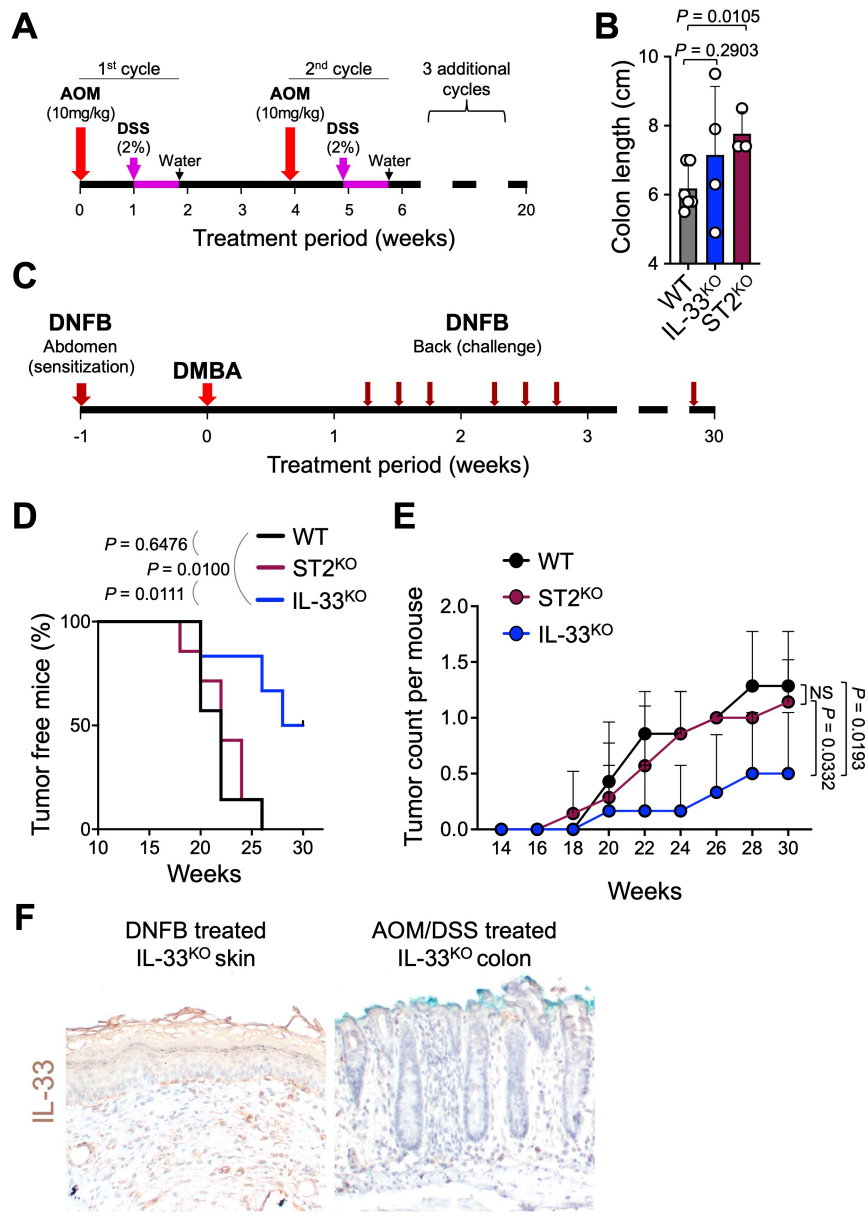

**Appendix Fig S1. IL-33/ST2 impact on colorectal and skin carcinogenesis in chronic inflammation.**

**(A)** Schematic diagram of colitis-induced colorectal carcinogenesis protocol in mice, consisting of five AOM/DSS treatment cycles over 20 weeks.

**(B)** Colon length measurement, from cecum to rectum, in WT (n=6), IL-33<sup>KO</sup> (n=4) and ST2<sup>KO</sup> (n=3) mice at the completion of the AOM/DSS carcinogenesis protocol.

**(C)** Experimental design for chronic inflammation-induced skin carcinogenesis consisting of an initial sensitization to DNFB allergen on the abdomen followed by treatment with a single dose of DMBA followed by DNFB challenges on the back skin three times a week for 29 weeks.

**(D and E)** Skin tumor outcome in WT (n=7), ST2<sup>KO</sup> (n=7) and IL-33<sup>KO</sup> (n=6) mice treated with DMBA/DNFB carcinogenesis protocol. (D) Time to tumor onset (log-rank test) and (E) the number of skin tumors over time.

**(F)** Representative images of IL-33 immunostained DNFB-treated skin and AOM/DSS-treated colon tissues from IL-33<sup>KO</sup> mice (scale bars: 100  $\mu$ m).

Data information: Graphs show mean + SD, NS: not significant, unpaired *t*-test.

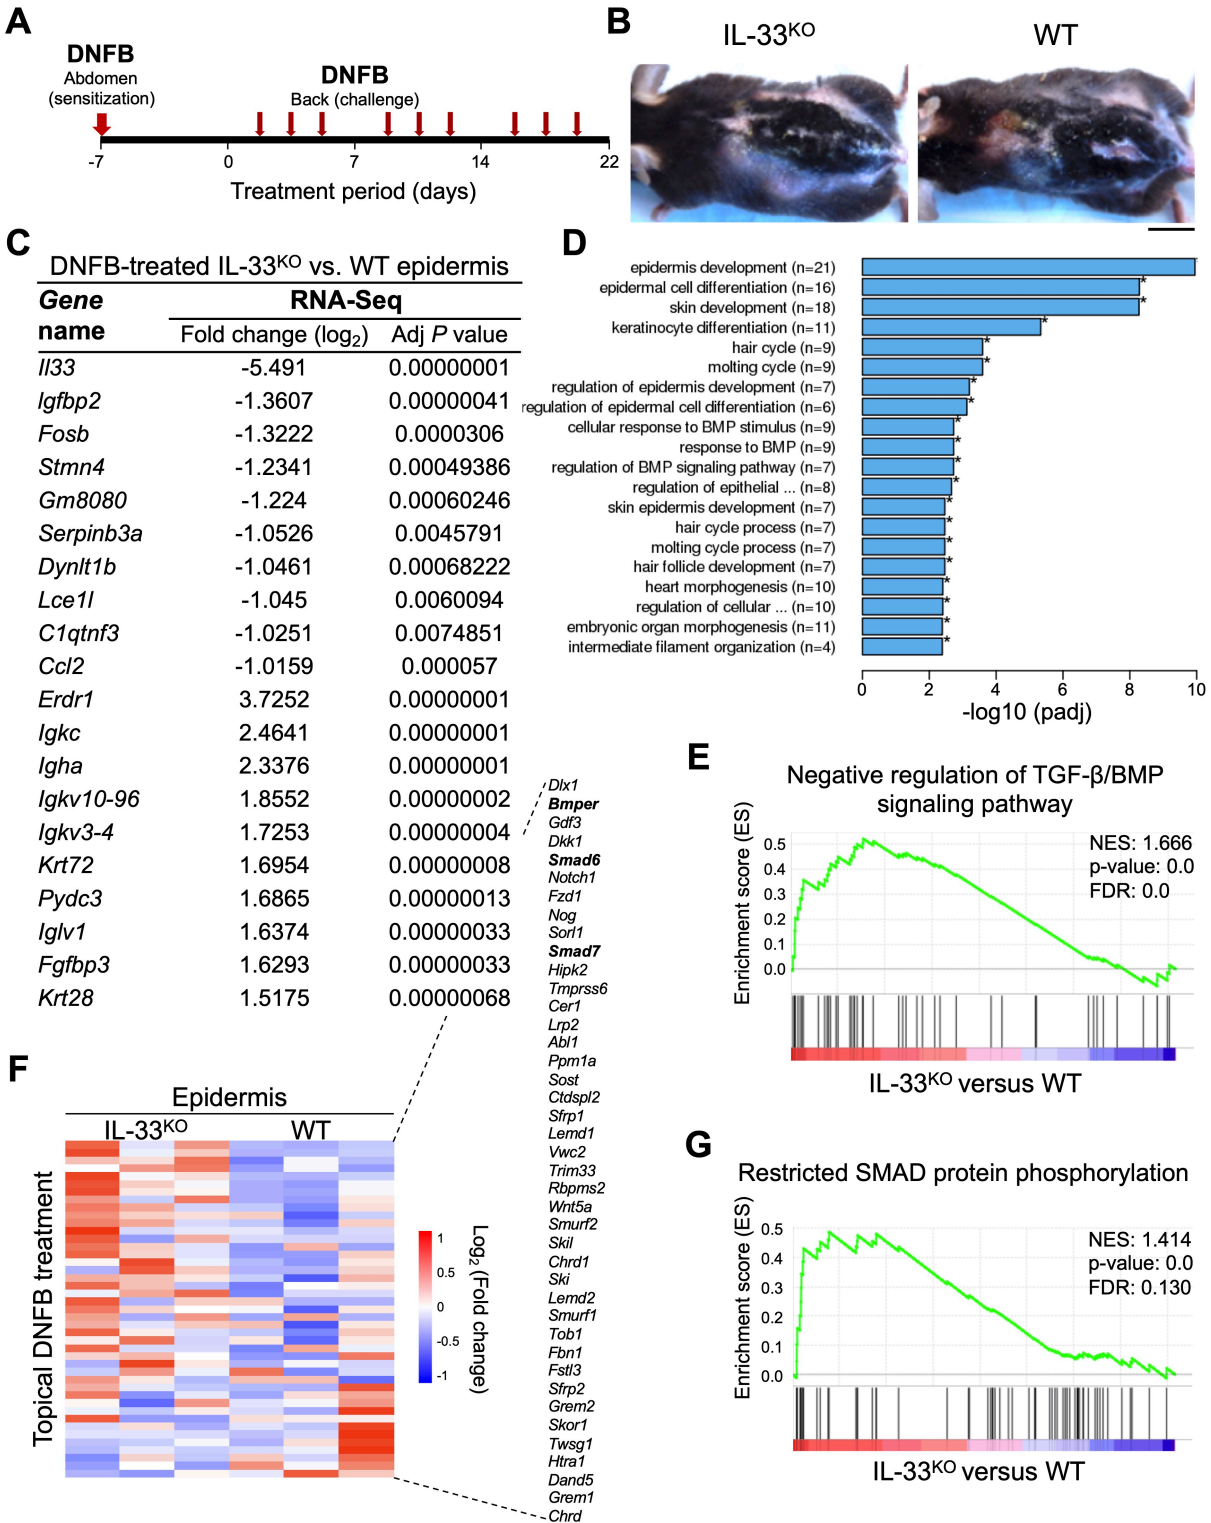

Appendix Fig S2. RNA-Seq analysis to identify IL-33 nuclear function.



- (A) The experimental design used to induce chronic skin inflammation with repeated topical DNFB treatment. At the completion of the 22-day treatment period, epidermis samples were collected for RNA-Seq.
- (B) Representative images of IL-33<sup>KO</sup> and WT mice after 22-day DNFB back skin treatment (scale bar: 1 cm).
- (C) Top 20 differentially expressed genes (DEGs) in DNFB-treated IL-33<sup>KO</sup> compared with WT epidermis from RNA-Seq.
- (D) Biological pathways highlighted by DEGs from RNA-Seq.
- (E) The enrichment plot of negative regulation of BMP signaling pathway gene set in IL-33<sup>KO</sup> compared with WT epidermis treated with DNFB.
- (F) Heatmap of negative regulation of TGF- $\beta$ /BMP signaling pathway gene set in IL-33<sup>KO</sup> versus WT epidermis after topical treatment with DNFB. This gene list contains several genes (highlighted) that are shared between BMP and TGF- $\beta$  signaling pathways.
- (G) The enrichment plot of a restricted SMAD protein phosphorylation gene set in IL-33<sup>KO</sup> compared with WT epidermis treated with DNFB.

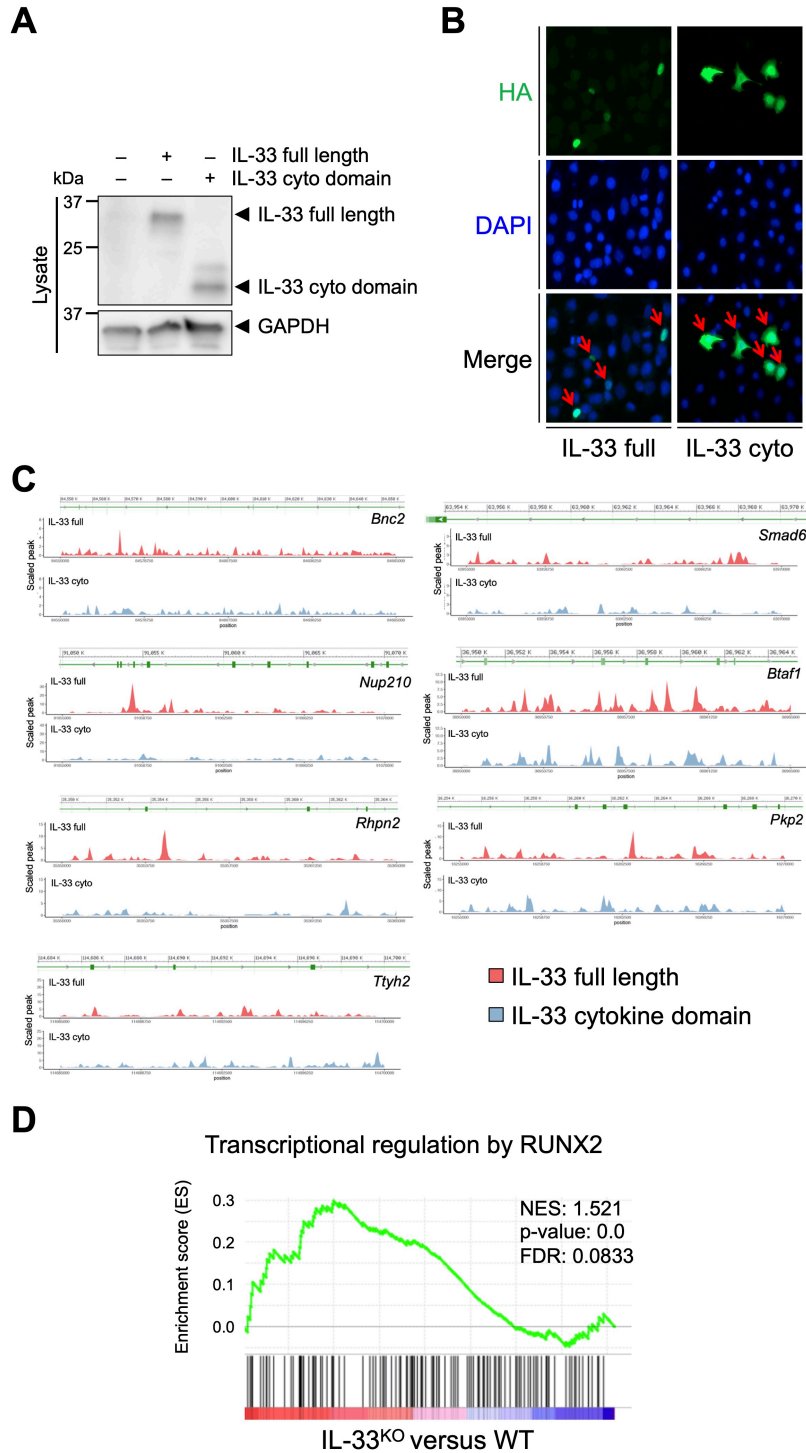

**Appendix Fig S3. Integrative analysis of RNA-Seq and ChIP-Seq results.**

(A) Expression of IL-33 full length and IL-33 cytokine domain in Pam212 cells. GAPDH is used as the control housekeeping protein.

**(B)** Representative images for localization of IL-33 expression constructs. Anti-HA antibody marks the IL-33 constructs. Red arrows point to the IL-33-positive cells.

**(C)** Peak calling analysis of genes identified from the integrative analysis of RNA-Seq and CHIP-Seq results. Genome-browser views of IL-33 full length (full) and IL-33 cytokine domain (cyto) CHIP-Seq signals for *Bnc2*, *Nup210*, *Rhpn2*, *Ttyh2*, *Smad6*, *Btaf1* and *Pkp2* genes.

**(D)** The enrichment plot of transcriptional regulation by RUNX2 gene set in IL-33<sup>KO</sup> compared with WT epidermis treated with DNFB from RNA-Seq analysis.

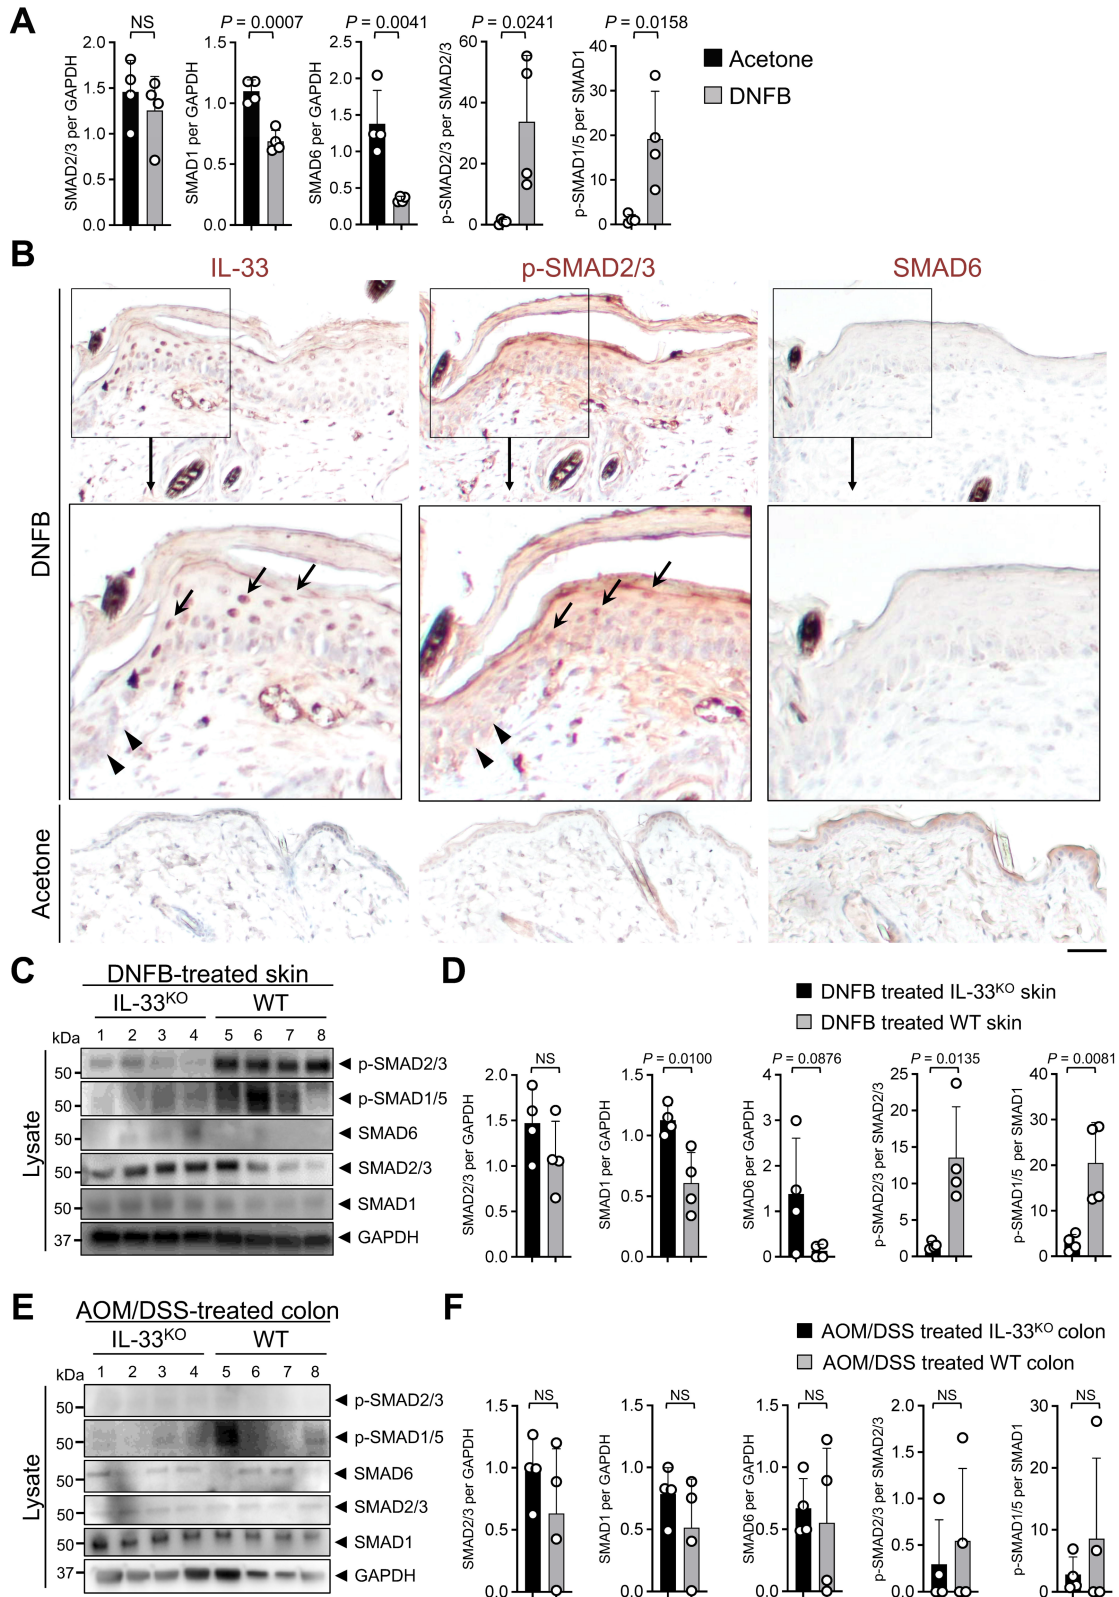

Appendix Fig S4. IL-33 regulates SMAD signaling in inflamed skin but not the colon.

(A) Quantification of protein bands shown in Figure 3A.

(B) Representative images of IL-33, p-SMAD2/3 and SMAD6 IHC on the adjacent sections of DNFB versus acetone-treated mouse skin. Arrows in the insets point to nuclear IL-33 and p-SMAD2/3 stains in the epidermis and arrowheads highlight keratinocytes nuclei that are negative for both IL-33 and p-SMAD2/3 (scale bar: 100  $\mu$ m).

(C) Immunoblots for p-SMAD2/3, p-SMAD1/5, SMAD6, SMAD2/3 and SMAD1 proteins in IL-33<sup>KO</sup> and WT skin after DNFB treatment.

(D) Quantification of protein bands shown in S4C.

(E) Immunoblots for p-SMAD2/3, p-SMAD1/5, SMAD6, SMAD2/3 and SMAD1 proteins in IL-33<sup>KO</sup> and WT colon after AOM/DSS treatment.

(F) Quantification of protein bands shown in S4E.

Data information: GAPDH is used as the control housekeeping protein, graphs show mean + SD,

NS: not significant, unpaired *t*-test.

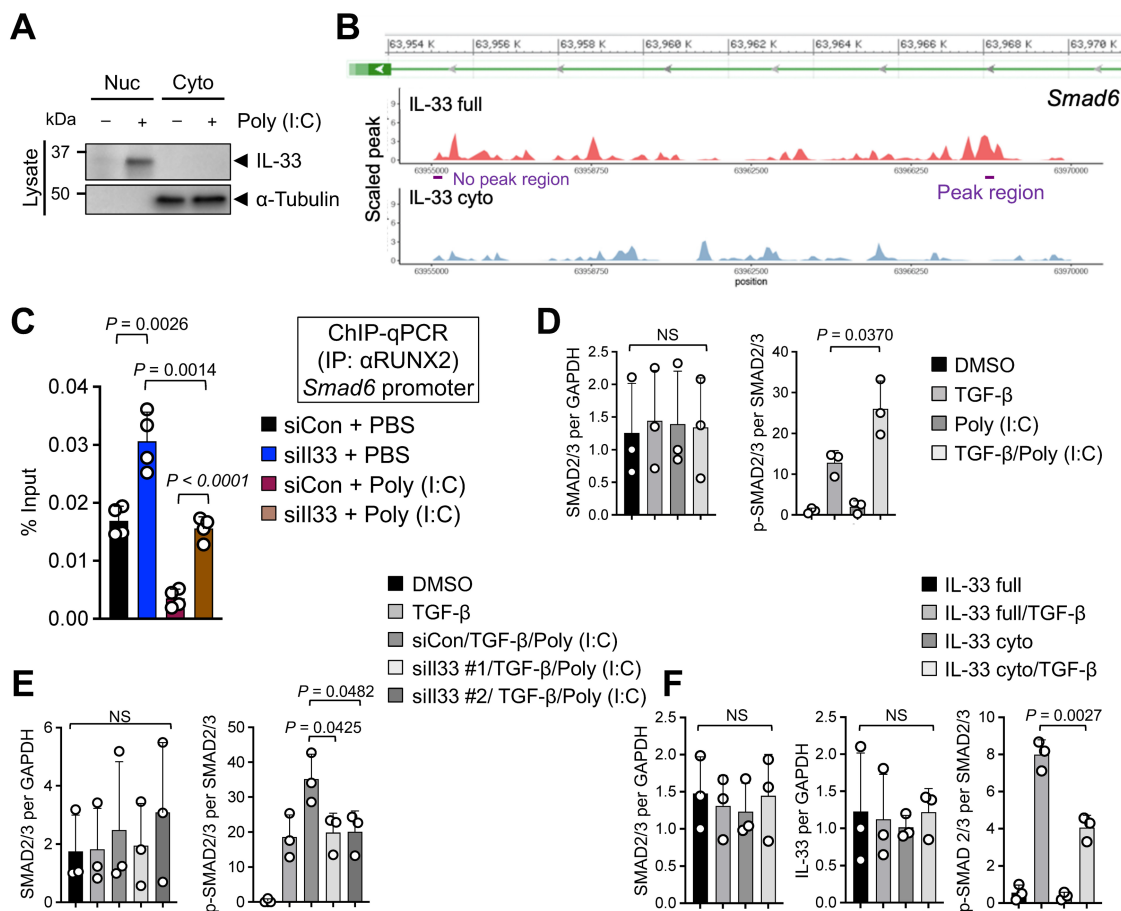

### Appendix Fig S5. Nuclear IL-33 induced by poly (I:C) binds to the *Smad6* regulatory region.

(A) IL-33 protein levels in nuclear (Nuc) and cytoplasmic (Cyto) fractions of Pam212 cells treated with poly (I:C). Each fraction's lysate was subjected to immunoblot with anti-IL-33 and anti- $\alpha$ -tubulin antibodies.

(B) Peak and no peak regions of *Smad6* regulatory region amplified in ChIP-qPCR assay using an anti-IL-33 antibody.

(C) ChIP-qPCR assay for *Smad6* promoter upon induction of endogenous IL-33 with or without sill33 using an anti-RUNX2 antibody. After transfection with sill33 #1 or control siRNA (siCon) for 24 hours, Pam212 cells were treated with poly (I:C) or PBS (carrier control). Cell lysates were subjected to chromatin-immunoprecipitation with anti-RUNX2 antibody and eluted RUNX2-bound chromatin was used for qPCR with *Smad6* promoter primers.

(D) Quantification of protein bands shown in Figure 3D.

(E) Quantification of protein bands shown in Figure 3E.

(F) Quantification of protein bands shown in Figure 3F.

Data information: Graphs show mean + SD, NS: not significant, unpaired *t*-test.

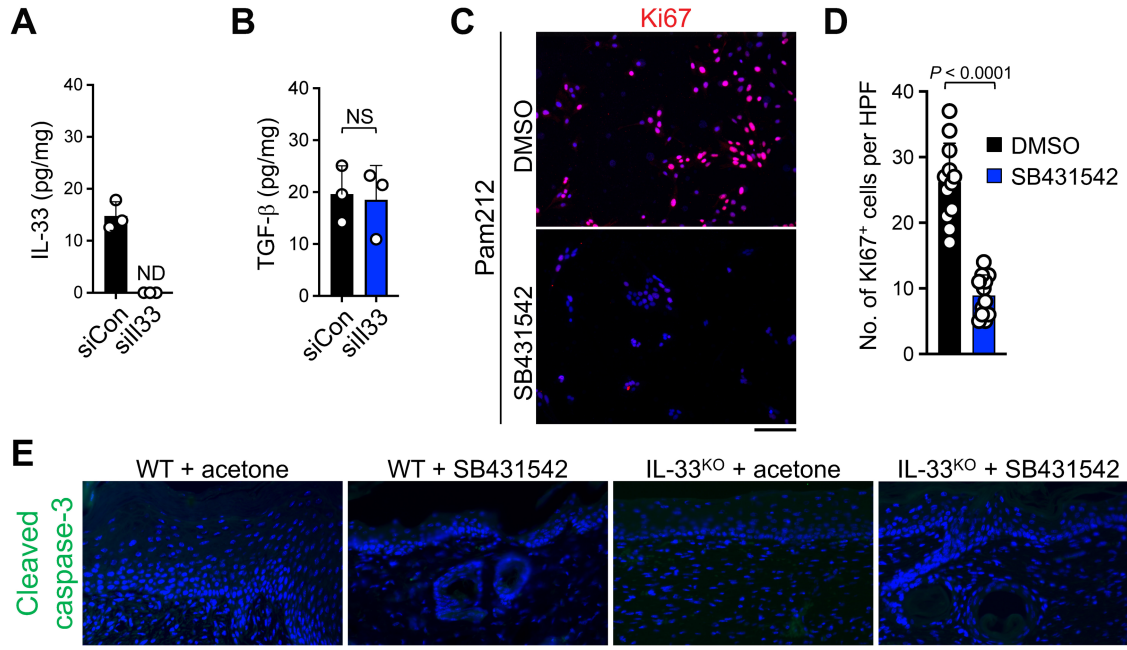

**Appendix Fig S6. SB431542 blocks keratinocyte proliferation but does not induce apoptosis.**

(A and B) Endogenous (A) IL-33 and (B) TGF- $\beta$  protein levels in Pam212 cell lysate after treatment with sill33 versus siCon. ND: not detected, NS: not significant.

(C) Representative images of Ki67-stained Pam212 cells treated with SB431542 or DMSO (carrier control) for 24 hours.

(D) Quantification of Ki67<sup>+</sup> Pam212 cells treated with SB431542 versus DMSO (unpaired *t*-test).

(E) Representative images of cleaved caspase-3 immunofluorescence-stained skin tissues shown in Figure 3I.

Data information: Scale bars: 100  $\mu$ m.



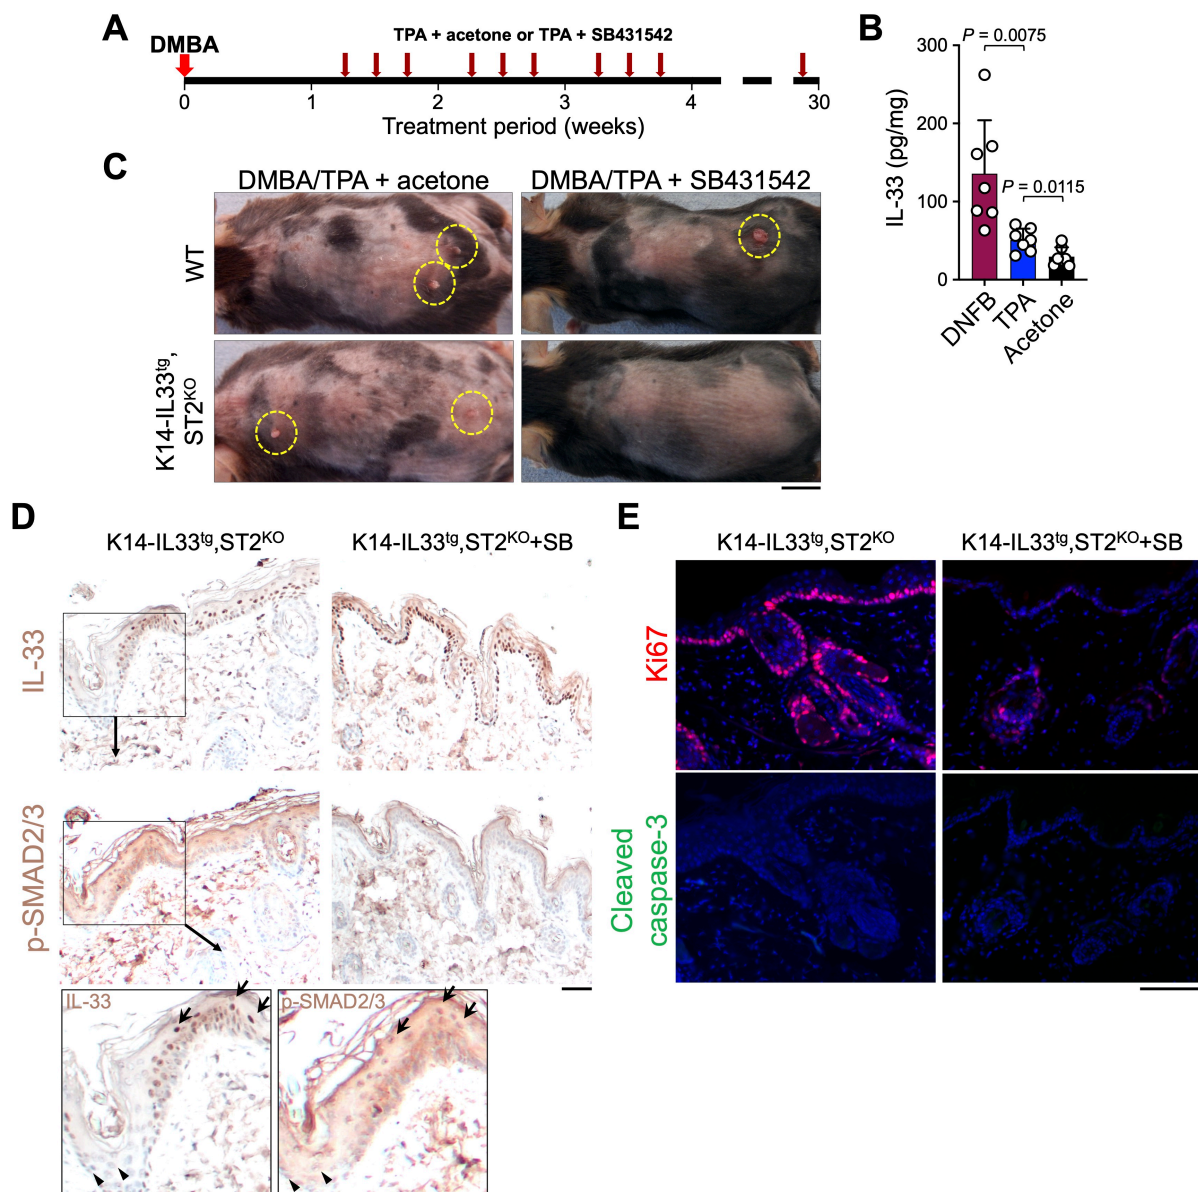

**Appendix Fig S7. Blocking TGF- $\beta$ /SMAD signaling attenuates nuclear IL-33 induced skin cancer development.**

(A) Experimental design for DMBA/TPA skin carcinogenesis protocol in combination with TGF- $\beta$ /SMAD inhibitor, SB431542, treatment.

(B) IL-33 protein levels in TPA- and DNFB-treated skin compared with acetone (carrier)-treated controls (n=7 in each group, graph shows mean + SD, unpaired *t*-test).

**(C)** Representative images of WT and K14-IL33<sup>tg</sup>,ST2<sup>KO</sup> mice treated with SB431542 or acetone (carrier control) at the completion of DMBA/TPA carcinogenesis protocol (yellow circles highlight the skin tumors).

**(D)** Representative images of IL-33 and p-SMAD2/3 immunostained adjacent skin sections from SB431542 and acetone-treated K14-IL33<sup>tg</sup>,ST2<sup>KO</sup> mice that completed DMBA/TPA carcinogenesis protocol. Arrows point to IL-33<sup>+</sup> and p-SMAD2/3<sup>+</sup> epidermal keratinocytes. Arrowheads highlight keratinocytes that lack both IL-33 and p-SMAD2/3.

**(E)** Representative images of Ki67 and cleaved caspase-3 immunofluorescence staining on the adjacent sections of SB431542 and acetone-treated K14-IL33<sup>tg</sup>,ST2<sup>KO</sup> skin that underwent DMBA/TPA carcinogenesis protocol.

Data information: Scale bars: mouse 1cm, tissue 100  $\mu$ m.

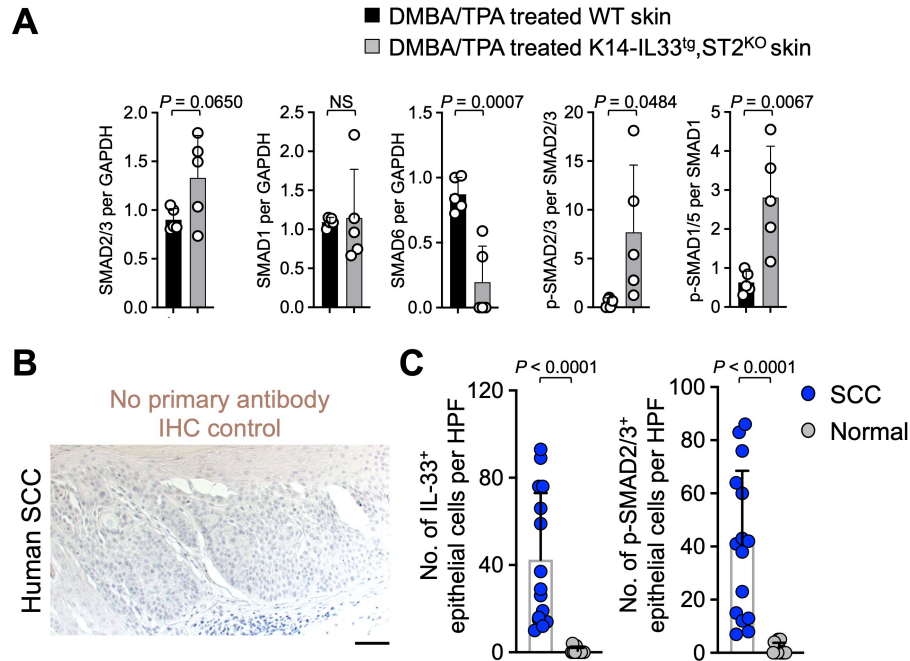

**Appendix Fig S8. IL-33 and p-SMAD2/3 are highly expressed in human SCC.**

(A) Quantification of protein bands shown in Figure 4I.

(B) Representative image of negative control (no primary antibody) immunostaining on the adjacent tissue section of the human SCC sample shown in Figure 4J (scale bar: 100  $\mu$ m).

(C) Quantification of nuclear IL-33<sup>+</sup> and p-SMAD2/3<sup>+</sup> epithelial cells per HPF in SCC versus normal human skin. Dots represent cell counts in three randomly selected HPF images per sample across 5 SCC and 5 normal skin samples.

Data information: Graphs show mean + SD, NS: not significant, unpaired *t*-test.

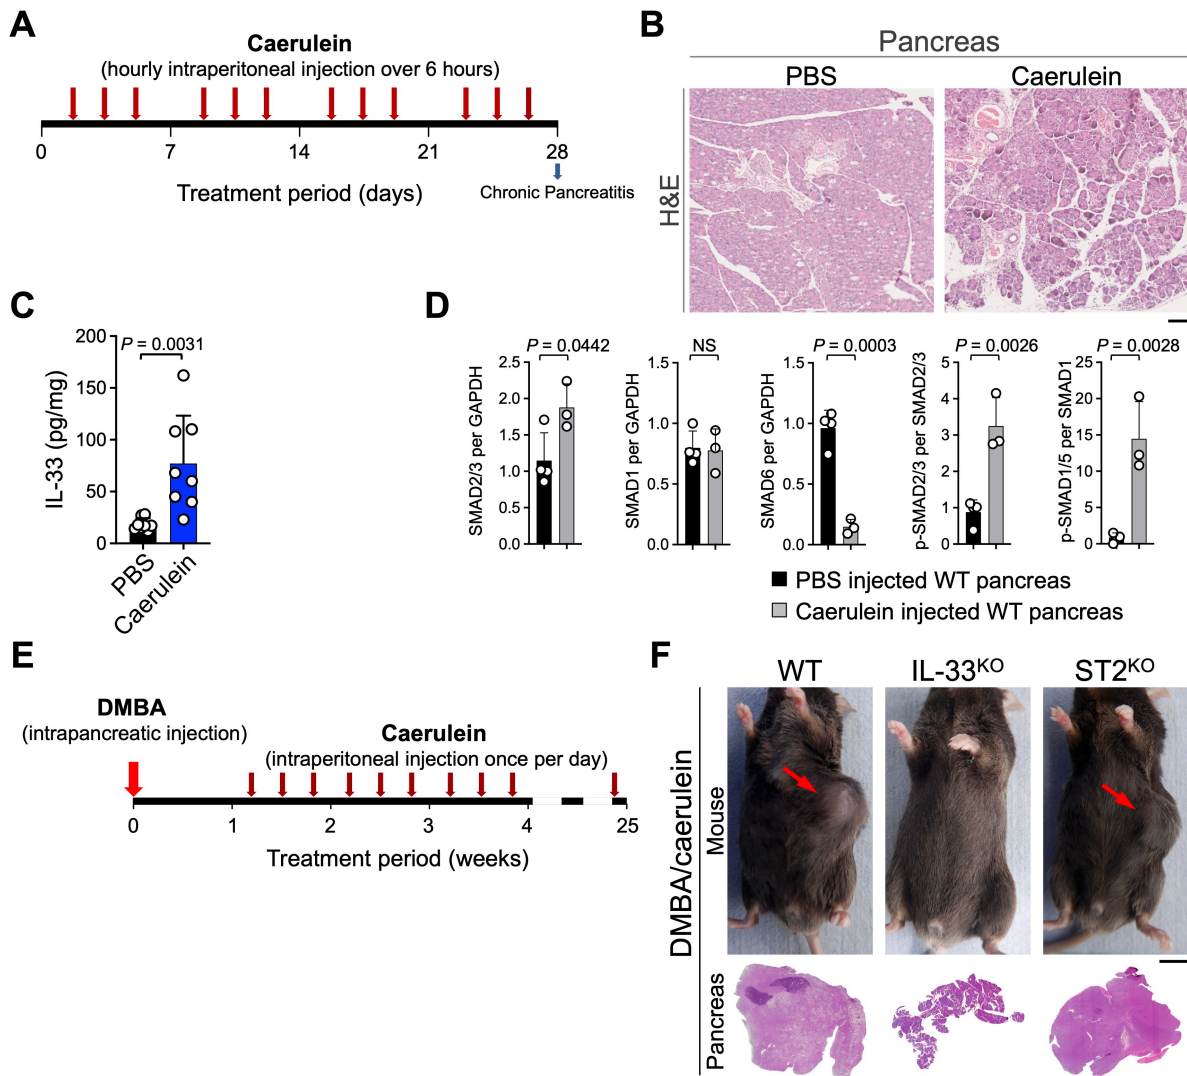

**Appendix Fig S9. Nuclear IL-33 promotes pancreatic cancer development in chronic pancreatitis.**

- (A) Experimental design for the induction of chronic pancreatitis in mice.
- (B) Representative images of H&E-stained pancreas of WT mice treated with caerulein versus PBS (carrier control) for 4 weeks (scale bar: 100  $\mu$ m).
- (C) IL-33 protein levels in caerulein- compared with PBS-treated pancreas.
- (D) Quantification of protein bands shown in Figure 5C.

(E) Experimental design for DMBA/caerulein-induced pancreatic cancer including an intrapancreatic injection with DMBA followed by intraperitoneal caerulein injections once per day, three times a week for 24 weeks.

(F) Representative images of DMBA/caerulein-treated WT, IL-33<sup>KO</sup> and ST2<sup>KO</sup> mice and H&E-stained pancreas of WT, IL-33<sup>KO</sup> and ST2<sup>KO</sup>. Red arrows point to pancreatic tumor mass under the skin of WT and ST2<sup>KO</sup> mice. Note the replacement of pancreas with large fibrotic tumors in WT and ST2<sup>KO</sup> mice (scale bar: 1 cm).

Data information: Graphs show mean + SD, NS: not significant, unpaired *t*-test.

## Appendix Tables

**Appendix Table S1. List of 203 DEGs from RNA-Seq analysis of IL-33<sup>KO</sup> versus WT epidermis treated with DNFB.**

| <u>Gene ID</u>     | <u>Gene Name</u> | <u>Gene Description</u>                                     |
|--------------------|------------------|-------------------------------------------------------------|
| ENSMUSG00000000184 | Ccnd2            | cyclin_D2                                                   |
| ENSMUSG00000001510 | Dlx3             | distal-less_homeobox_3                                      |
| ENSMUSG00000001655 | Hoxc13           | homeobox_C13                                                |
| ENSMUSG00000002057 | Foxn1            | forkhead_box_N1                                             |
| ENSMUSG00000003418 | St8sia6          | ST8_alpha-N-acetyl-neuraminide_alpha-28-sialyltransferase_6 |
| ENSMUSG00000003545 | Fosb             | FBJ_osteosarcoma_oncogene_B                                 |
| ENSMUSG00000004552 | Ctse             | cathepsin_E                                                 |
| ENSMUSG00000005262 | Ufd1l            | ubiquitin_fusion_degradation_1_like                         |
| ENSMUSG00000006345 | Ggt1             | gamma-glutamyltransferase_1                                 |
| ENSMUSG00000014846 | Tppp3            | tubulin_polymerization-promoting_protein_family_member_3    |
| ENSMUSG00000015441 | Gzmf             | granzyme_F                                                  |
| ENSMUSG00000015619 | Gata3            | GATA_binding_protein_3                                      |
| ENSMUSG00000015957 | Wnt11            | wingless-type_MMTV_integration_site_family_member_11        |
| ENSMUSG00000017588 | Krt27            | keratin_27                                                  |
| ENSMUSG00000018983 | E2f2             | E2F_transcription_factor_2                                  |
| ENSMUSG00000019564 | Arid3a           | AT_rich_interactive_domain_3A_(BRIGHT-like)                 |
| ENSMUSG00000020099 | Unc5b            | unc-5_homolog_B_(C_elegans)                                 |
| ENSMUSG00000020216 | Jsrp1            | junctional_sarcoplasmic_reticulum_protein_1                 |
| ENSMUSG00000020473 | Aebp1            | AE_binding_protein_1                                        |
| ENSMUSG00000020723 | Cacng4           | calcium_channel_voltage-dependent_gamma_subunit_4           |
| ENSMUSG00000020732 | Rab37            | RAB37_member_RAS_oncogene_family                            |
| ENSMUSG00000020871 | Dlx4             | distal-less_homeobox_4                                      |
| ENSMUSG00000020891 | Alox8            | arachidonate_8-lipoxygenase                                 |
| ENSMUSG00000020916 | Krt36            | keratin_36                                                  |
| ENSMUSG00000021061 | Sptb             | spectrin_beta_erythrocytic                                  |
| ENSMUSG00000021250 | Fos              | FBJ_osteosarcoma_oncogene                                   |
| ENSMUSG00000021469 | Msx2             | msh_homeobox_2                                              |
| ENSMUSG00000022044 | Stmn4            | stathmin-like_4                                             |
| ENSMUSG00000022243 | Slc45a2          | solute_carrier_family_45_member_2                           |
| ENSMUSG00000022415 | Syng1            | synaptogyrin_1                                              |
| ENSMUSG00000022658 | Tagln3           | transgelin_3                                                |
| ENSMUSG00000022871 | Fetub            | fetuin_beta                                                 |
| ENSMUSG00000022986 | Krt75            | keratin_75                                                  |
| ENSMUSG00000023034 | Nr4a1            | nuclear_receptor_subfamily_4_group_A_member_1               |

|                    |          |                                                                              |
|--------------------|----------|------------------------------------------------------------------------------|
| ENSMUSG00000023387 | Kcnk16   | potassium_channel_subfamily_K_member_16                                      |
| ENSMUSG00000023391 | Dlx2     | distal-less_homeobox_2                                                       |
| ENSMUSG00000024059 | Clip4    | CAP-GLY_domain_containing_linker_protein_family_member_4                     |
| ENSMUSG00000024190 | Dusp1    | dual_specificity_phosphatase_1                                               |
| ENSMUSG00000024232 | Bambi    | BMP_and_activin_membrane-bound_inhibitor                                     |
| ENSMUSG00000024353 | Mzb1     | marginal_zone_B_and_B1_cell-specific_protein_1                               |
| ENSMUSG00000024409 | Psors1c2 | psoriasis_susceptibility_1_candidate_2_(human)                               |
| ENSMUSG00000024471 | Myot     | myotilin                                                                     |
| ENSMUSG00000024538 | Ppic     | peptidylprolyl_isomerase_C                                                   |
| ENSMUSG00000024806 | Mlana    | melan-A                                                                      |
| ENSMUSG00000024810 | Il33     | interleukin_33                                                               |
| ENSMUSG00000024975 | Pdcd4    | programmed_cell_death_4                                                      |
| ENSMUSG00000025328 | Padi3    | peptidyl_arginine_deiminase_type_III                                         |
| ENSMUSG00000025329 | Padi1    | peptidyl_arginine_deiminase_type_I                                           |
| ENSMUSG00000025359 | Pmel     | premelanosome_protein                                                        |
| ENSMUSG00000025407 | Gli1     | GLI-Kruppel_family_member_GLI1                                               |
| ENSMUSG00000025453 | Nnt      | nicotinamide_nucleotide_transhydrogenase                                     |
| ENSMUSG00000025461 | Cd163l1  | CD163_molecule-like_1                                                        |
| ENSMUSG00000026407 | Cacna1s  | calcium_channel_voltage-dependent_L_type_alpha_1S_subunit                    |
| ENSMUSG00000026420 | Il24     | interleukin_24                                                               |
| ENSMUSG00000026489 | Adck3    | aarF_domain_containing_kinase_3                                              |
| ENSMUSG00000026950 | Neb      | nebulin                                                                      |
| ENSMUSG00000027015 | Cybrd1   | cytochrome_b_reductase_1                                                     |
| ENSMUSG00000027403 | Tgm6     | transglutaminase_6                                                           |
| ENSMUSG00000027470 | Mylk2    | myosin_light_polypeptide_kinase_2_skeletal_muscle                            |
| ENSMUSG00000027487 | Cdk5rap1 | CDK5_regulatory_subunit_associated_protein_1                                 |
| ENSMUSG00000027800 | Tm4sf1   | transmembrane_4_superfamily_member_1                                         |
| ENSMUSG00000028111 | Ctsk     | cathepsin_K                                                                  |
| ENSMUSG00000028195 | Cyr61    | cysteine_rich_protein_61                                                     |
| ENSMUSG00000028358 | Zfp618   | zinc_finger_protein_618                                                      |
| ENSMUSG00000028487 | Bnc2     | basonuclin_2                                                                 |
| ENSMUSG00000028654 | Mycl     | v-myc_myelocytomatosis_viral_oncogene_homolog_lung_carcinoma_derived_(avian) |
| ENSMUSG00000028681 | Ptch2    | patched_homolog_2                                                            |
| ENSMUSG00000028698 | Pik3r3   | phosphatidylinositol_3_kinase_regulatory_subunit_polypeptide_3_(p55)         |
| ENSMUSG00000028940 | Hes2     | hairy_and_enhancer_of_split_2_(Drosophila)                                   |
| ENSMUSG00000029070 | Mxra8    | matrix-remodelling_associated_8                                              |
| ENSMUSG00000029095 | Ablim2   | actin-binding_LIM_protein_2                                                  |
| ENSMUSG00000029337 | Fgf5     | fibroblast_growth_factor_5                                                   |
| ENSMUSG00000029380 | Cxcl1    | chemokine_(C-X-C_motif)_ligand_1                                             |

|                    |               |                                                                                              |
|--------------------|---------------|----------------------------------------------------------------------------------------------|
| ENSMUSG00000029641 | Rasl11a       | RAS-like_family_11_member_A                                                                  |
| ENSMUSG00000029705 | Cux1          | cut-like_homeobox_1                                                                          |
| ENSMUSG00000030091 | Nup210        | nucleoporin_210                                                                              |
| ENSMUSG00000030108 | Slc6a13       | solute_carrier_family_6_(neurotransmitter_transporter_GABA)_member_13                        |
| ENSMUSG00000030205 | Gprc5d        | G_protein-coupled_receptor_family_C_group_5_member_D                                         |
| ENSMUSG00000030409 | Dmpk          | dystrophia_myotonica-protein_kinase                                                          |
| ENSMUSG00000030494 | Rhpn2         | rhophilin_Rho_GTPase_binding_protein_2                                                       |
| ENSMUSG00000030523 | Trpm1         | transient_receptor_potential_cation_channel_subfamily_M_member_1                             |
| ENSMUSG00000030592 | Ryr1          | ryanodine_receptor_1_skeletal_muscle                                                         |
| ENSMUSG00000030717 | Nupr1         | nuclear_protein_transcription_regulator_1                                                    |
| ENSMUSG00000030739 | Myh14         | myosin_heavy_polypeptide_14                                                                  |
| ENSMUSG00000030905 | Crym          | crystallin_mu                                                                                |
| ENSMUSG00000031963 | Bmper         | BMP-binding_endothelial_regulator                                                            |
| ENSMUSG00000031995 | St14          | suppression_of_tumorigenicity_14_(colon_carcinoma)                                           |
| ENSMUSG00000032053 | Pou2af1       | POU_domain_class_2_associating_factor_1                                                      |
| ENSMUSG00000032327 | Stra6         | stimulated_by_retinoic_acid_gene_6                                                           |
| ENSMUSG00000032368 | Zic1          | zinc_finger_protein_of_the_cerebellum_1                                                      |
| ENSMUSG00000032500 | Dclk3         | doublecortin-like_kinase_3                                                                   |
| ENSMUSG00000032648 | Pygm          | muscle_glycogen_phosphorylase                                                                |
| ENSMUSG00000032841 | Prr5l         | proline_rich_5_like                                                                          |
| ENSMUSG00000034714 | Ttyh2         | tweety_homolog_2_(Drosophila)                                                                |
| ENSMUSG00000035385 | Ccl2          | chemokine_(C-C_motif)_ligand_2                                                               |
| ENSMUSG00000035831 | Krt25         | keratin_25                                                                                   |
| ENSMUSG00000036306 | Lzts1         | leucine_zipper_putative_tumor_suppressor_1                                                   |
| ENSMUSG00000036867 | Smad6         | SMAD_family_member_6                                                                         |
| ENSMUSG00000036923 | Stox1         | storkhead_box_1                                                                              |
| ENSMUSG00000037169 | Mycn          | v-myc_myelocytomatosis_viral_related_oncogene_neuroblastoma_derived_(avian)                  |
| ENSMUSG00000037434 | Slc30a1       | solute_carrier_family_30_(zinc_transporter)_member_1                                         |
| ENSMUSG00000037846 | Rtkn2         | rhotekin_2                                                                                   |
| ENSMUSG00000037977 | 6430571L13Rik | RIKEN_cDNA_6430571L13_gene                                                                   |
| ENSMUSG00000038580 | Sct           | secretin                                                                                     |
| ENSMUSG00000038599 | Capn8         | calpain_8                                                                                    |
| ENSMUSG00000039217 | Il18          | interleukin_18                                                                               |
| ENSMUSG00000039323 | Igfbp2        | insulin-like_growth_factor_binding_protein_2                                                 |
| ENSMUSG00000040565 | Btaf1         | BTAf1_RNA_polymerase_II_B-TFIID_transcription_factor-associated_(Mot1_homolog_S._cerevisiae) |
| ENSMUSG00000041120 | Nbl1          | neuroblastoma_suppression_of_tumorigenicity_1                                                |
| ENSMUSG00000041911 | Dlx1          | distal-less_homeobox_1                                                                       |
| ENSMUSG00000041957 | Pkp2          | plakophilin_2                                                                                |



|                    |          |                                                                           |
|--------------------|----------|---------------------------------------------------------------------------|
| ENSMUSG00000042092 | Lce1c    | late_cornified_envelope_1C                                                |
| ENSMUSG00000042109 | Csdc2    | cold_shock_domain_containing_C2_RNA_binding                               |
| ENSMUSG00000042532 | Golga7b  | golgi_autoantigen_golgin_subfamily_a_7B                                   |
| ENSMUSG00000043461 | Sptssb   | serine_palmitoyltransferase_small_subunit_B                               |
| ENSMUSG00000044243 | Bhlha9   | basic_helix-loop-helix_family_member_a9                                   |
| ENSMUSG00000044430 | Klk12    | kallikrein_related-peptidase_12                                           |
| ENSMUSG00000044594 | Serpib3a | serine_(or_cysteine)_peptidase_inhibitor_clade_B_(ovalbumin)_member_3A    |
| ENSMUSG00000045005 | Fzd5     | frizzled_homolog_5_(Drosophila)                                           |
| ENSMUSG00000046676 | Lce1l    | late_cornified_envelope_1L                                                |
| ENSMUSG00000046997 | Spsb4    | splA/ryanodine_receptor_domain_and_SOCS_box_containing_4                  |
| ENSMUSG00000047419 | Cmya5    | cardiomyopathy_associated_5                                               |
| ENSMUSG00000047420 | Fam180a  | family_with_sequence_similarity_180_member_A                              |
| ENSMUSG00000047632 | Fgfbp3   | fibroblast_growth_factor_binding_protein_3                                |
| ENSMUSG00000048450 | Msx1     | msh_homeobox_1                                                            |
| ENSMUSG00000048582 | Gja3     | gap_junction_protein_alpha_3                                              |
| ENSMUSG00000051586 | Mical3   | microtubule_associated_monooxygenase_calponin_and_LIM_domain_containing_3 |
| ENSMUSG00000051879 | Krt71    | keratin_71                                                                |
| ENSMUSG00000052302 | Tbc1d30  | TBC1_domain_family_member_30                                              |
| ENSMUSG00000052415 | Tchh     | trichohyalin                                                              |
| ENSMUSG00000052512 | Nav2     | neuron_navigator_2                                                        |
| ENSMUSG00000053414 | Hunk     | hormonally_upregulated_Neu-associated_kinase                              |
| ENSMUSG00000053897 | Slc39a8  | solute_carrier_family_39_(metal_ion_transporter)_member_8                 |
| ENSMUSG00000054083 | Capn12   | calpain_12                                                                |
| ENSMUSG00000054196 | Cthrc1   | collagen_triple_helix_repeat_containing_1                                 |
| ENSMUSG00000055194 | Actbl2   | actin_beta-like_2                                                         |
| ENSMUSG00000055632 | Hmcn2    | hemicentin_2                                                              |
| ENSMUSG00000055937 | Krt28    | keratin_28                                                                |
| ENSMUSG00000056270 | Prr9     | proline_rich_9                                                            |
| ENSMUSG00000056605 | Krt72    | keratin_72                                                                |
| ENSMUSG00000057137 | Tmem140  | transmembrane_protein_140                                                 |
| ENSMUSG00000058914 | C1qtnf3  | C1q_and_tumor_necrosis_factor_related_protein_3                           |
| ENSMUSG00000059493 | Nhs      | Nance-Horan_syndrome_(human)                                              |
| ENSMUSG00000059921 | Unc5c    | unc-5_homolog_C_(C._elegans)                                              |
| ENSMUSG00000059970 | Hspa2    | heat_shock_protein_2                                                      |
| ENSMUSG00000066677 | Pydc3    | pyrin_domain_containing_3                                                 |
| ENSMUSG00000066975 | Cryba4   | crystallin_beta_A4                                                        |
| ENSMUSG00000067149 | Igj      | immunoglobulin_joining_chain                                              |
| ENSMUSG00000068874 | Selenbp1 | selenium_binding_protein_1                                                |
| ENSMUSG00000070990 | Foxe1    | forkhead_box_E1                                                           |

|                    |               |                                                                         |
|--------------------|---------------|-------------------------------------------------------------------------|
| ENSMUSG00000072844 | G530011O06Rik | RIKEN_cDNA_G530011O06_gene                                              |
| ENSMUSG00000073413 | Ly6g6d        | lymphocyte_antigen_6_complex_locus_G6D                                  |
| ENSMUSG00000073643 | Wdfy1         | WD_repeat_and_FYVE_domain_containing_1                                  |
| ENSMUSG00000073791 | Efcab7        | EF-hand_calcium_binding_domain_7                                        |
| ENSMUSG00000074037 | Mc1r          | melanocortin_1_receptor                                                 |
| ENSMUSG00000074093 | Svip          | small_VCP/p97-interacting_protein                                       |
| ENSMUSG00000074206 | Adh6b         | alcohol_dehydrogenase_6B_(class_V)                                      |
| ENSMUSG00000074445 | Sprr2a3       | small_proline-rich_protein_2A3                                          |
| ENSMUSG00000075570 | Krt26         | keratin_26                                                              |
| ENSMUSG00000076508 | Igkv17-127    | immunoglobulin_kappa_variable_17-127                                    |
| ENSMUSG00000076514 | Igkv17-121    | immunoglobulin_kappa_variable_17-121                                    |
| ENSMUSG00000076523 | Igkv15-103    | immunoglobulin_kappa_chain_variable_15-103                              |
| ENSMUSG00000076526 | Igkv12-98     | immunoglobulin_kappa_variable_12-98                                     |
| ENSMUSG00000076563 | Igkv5-48      | immunoglobulin_kappa_variable_5-48                                      |
| ENSMUSG00000076564 | Igkv12-46     | immunoglobulin_kappa_variable_12-46                                     |
| ENSMUSG00000076569 | Igkv5-39      | immunoglobulin_kappa_variable_5-39                                      |
| ENSMUSG00000076577 | Igkv8-30      | immunoglobulin_kappa_chain_variable_8-30                                |
| ENSMUSG00000076609 | Igkc          | immunoglobulin_kappa_constant                                           |
| ENSMUSG00000076613 | Ighg2b        | immunoglobulin_heavy_constant_gamma_2B                                  |
| ENSMUSG00000076672 | Ighv3-6       | immunoglobulin_heavy_variable_3-6                                       |
| ENSMUSG00000076674 | Ighv3-8       | immunoglobulin_heavy_variable_V3-8                                      |
| ENSMUSG00000076934 | Iglv1         | immunoglobulin_lambda_variable_1                                        |
| ENSMUSG00000076937 | Iglc2         | immunoglobulin_lambda_constant_2                                        |
| ENSMUSG00000078657 | Crnn          | cornulin                                                                |
| ENSMUSG00000084228 | Gm8080        | predicted_gene_8080                                                     |
| ENSMUSG00000085645 | Hoxb5os       | homeobox_B5_and_homeobox_B6_opposite_strand                             |
| ENSMUSG00000092341 | Malat1        | metastasis_associated_lung_adenocarcinoma_transcript_1_(non-coding_RNA) |
| ENSMUSG00000092572 | Serpib10      | serine_(or_cysteine)_peptidase_inhibitor_clade_B_(ovalbumin)_member_10  |
| ENSMUSG00000093861 | Igkv1-110     | immunoglobulin_kappa_variable_1-110                                     |
| ENSMUSG00000094335 | Igkv1-117     | immunoglobulin_kappa_variable_1-117                                     |
| ENSMUSG00000094420 | Igkv10-96     | immunoglobulin_kappa_variable_10-96                                     |
| ENSMUSG00000094546 | Ighv1-26      | immunoglobulin_heavy_variable_1-26                                      |
| ENSMUSG00000094724 | Rnaset2b      | ribonuclease_T2B                                                        |
| ENSMUSG00000094797 | Igkv6-15      | immunoglobulin_kappa_variable_6-15                                      |
| ENSMUSG00000094930 | Igkv6-25      | immunoglobulin_kappa_chain_variable_6-25                                |
| ENSMUSG00000095079 | Igha          | immunoglobulin_heavy_constant_alpha                                     |
| ENSMUSG00000095351 | Igkv3-2       | immunoglobulin_kappa_variable_3-2                                       |
| ENSMUSG00000095571 | Ighv5-17      | immunoglobulin_heavy_variable_5-17                                      |
| ENSMUSG00000095630 | Igkv6-23      | immunoglobulin_kappa_variable_6-23                                      |

|                    |              |                                       |
|--------------------|--------------|---------------------------------------|
| ENSMUSG00000095687 | Rnaset2a     | ribonuclease_T2A                      |
| ENSMUSG00000095700 | Ighv10-3     | immunoglobulin_heavy_variable_V10-3   |
| ENSMUSG00000095870 | Lce1k        | late_cornified_envelope_1K            |
| ENSMUSG00000095930 | Nim1k        | NIM1_serine/threonine_protein_kinase  |
| ENSMUSG00000096255 | Dynlt1b      | dynein_light_chain_Tctex-type_1B      |
| ENSMUSG00000096336 | Igkv1-135    | immunoglobulin_kappa_variable_1-135   |
| ENSMUSG00000096422 | Igkv12-44    | immunoglobulin_kappa_variable_12-44   |
| ENSMUSG00000096459 | Ighv9-3      | immunoglobulin_heavy_variable_V9-3    |
| ENSMUSG00000096715 | Igkv3-4      | immunoglobulin_kappa_variable_3-4     |
| ENSMUSG00000096768 | Erdr1        | erythroid_differentiation_regulator_1 |
| ENSMUSG00000096780 | Tmem181b-ps  | transmembrane_protein_181B_pseudogene |
| ENSMUSG00000096862 | Gm13301      | predicted_gene_13301                  |
| ENSMUSG00000097296 | Gm26532      | predicted_gene_26532                  |
| ENSMUSG00000101026 | RP23-230O9.7 | RIKEN_cDNA_D730001G18_gene            |

Appendix Table S2. Antibodies, staining kits and primers information.

| <b><u>Western blotting Antibodies</u></b>            | <b><u>Clone</u></b> | <b><u>Company</u></b>                  |
|------------------------------------------------------|---------------------|----------------------------------------|
| <b><i>Primary antibodies</i></b>                     |                     |                                        |
| p-SMAD2/3                                            | D27F4               | Cell Signaling Technology, Danvers, MA |
| p-SMAD1/5                                            | 41D10               | Cell Signaling Technology              |
| RUNX2                                                | D1L7F               | Cell Signaling Technology              |
| GAPDH                                                | D16H11              | Cell Signaling Technology              |
| Anti-mouse IL-33                                     | Polyclonal          | R&D Systems, Minneapolis, MN           |
| SMAD2/3                                              | Polyclonal          | R&D Systems                            |
| SMAD6                                                | Polyclonal          | NOVUS biologicals, Centennial, CO      |
| SMAD1                                                | EP565Y              | Abcam, Cambridge, UK                   |
| HA                                                   | 16B12               | Biolegend, San Diego, CA               |
| <b><i>Secondary antibodies</i></b>                   |                     |                                        |
|                                                      | <b><u>Cat #</u></b> | <b><u>Company</u></b>                  |
| Peroxidase Goat Anti-Mouse IgG                       | 115-035-003         | Jackson ImmunoResearch, West Grove, PA |
| Peroxidase Goat Anti-Rabbit IgG                      | 111-035-003         | Jackson ImmunoResearch                 |
| Peroxidase Bovine Anti-Goat IgG                      | 805-035-180         | Jackson ImmunoResearch                 |
| <b><i>siRNA</i></b>                                  |                     |                                        |
|                                                      | <b><u>Cat #</u></b> | <b><u>Company</u></b>                  |
| sill33 #1                                            | SI00870443          | QIAGEN, Hilden, Germany                |
| sill33 #2                                            | SI00870450          | QIAGEN                                 |
| siCon                                                | 1022076             | QIAGEN                                 |
| <b><i>Immunostaining antibodies</i></b>              |                     |                                        |
|                                                      | <b><u>Clone</u></b> | <b><u>Company</u></b>                  |
| IL-33 (mouse)                                        | Nessy-1             | ENZO, Farmingdale, NY                  |
| IL-33 (human)                                        | Polyclonal          | Sigma, St. Louis, MO                   |
| p-SMAD2/3 (mouse and human)                          | D27F4               | Cell Signaling Technology              |
| <b><i>Staining kits</i></b>                          |                     |                                        |
|                                                      | <b><u>Cat #</u></b> | <b><u>Company</u></b>                  |
| Antigen unmasking solution                           | H3300               | Vector Laboratories, Burlingame, CA    |
| VECTASTAIN Elite ABC universal Kit                   | PK6200              | Vector Laboratories                    |
| ImmPACT DAB chromogen staining kit                   | SK-4105             | Vector Laboratories                    |
| <b><i>Immunofluorescence staining Antibodies</i></b> |                     |                                        |
|                                                      | <b><u>Clone</u></b> | <b><u>Company</u></b>                  |
| Ki67                                                 | Polyclonal          | Abcam                                  |
| Cleaved caspase-3 (Asp 175)                          | 5A1E                | Cell Signaling Technology              |
| <b><i>Secondary antibodies</i></b>                   |                     |                                        |
|                                                      | <b><u>Cat #</u></b> | <b><u>Company</u></b>                  |
| Goat anti-Mouse IgG, Alexa Fluor 488 conjugate       | A32723              | Thermo Fisher Scientific, Waltham, MA  |
| Goat anti-Rabbit IgG, Alexa Fluor 647 conjugate      | A32733              | Thermo Fisher Scientific               |

**qPCR primers*****Taqman****Il33***Cat #**Mm.PT.58.  
12022572**Company**Integrated DNA Technologies, Coralville,  
Iowa*Gapdh*

Mm.PT.39a.1

Integrated DNA Technologies

***SYBR green****Smad6*

forward: GCAACCCCTACCACTTCAGC

reverse: GTGGCTTGTACTGGTCAGGAG

*Gapdh*

forward: AATGTGTCCGTCGTGGATCTGA

reverse: GATGCCTGCTTCACCACCTTCT

*Smad6 promoter*

forward: GGACTGACTCTAAAGTGCTATGCGC

reverse: ACAGTGCCCGCGACTCACTCTCAAG

*Smad6 no peak*

forward: GTTCAGATGATGTGGCAGAA

reverse: CTTTCTAAGCCCTGGGACCCT

*Smad6 peak*

forward: CTTGGCAATCCTCAGAGAAG

reverse: ATGAGTGGATTACATAGTCAG

**PCR primers for mouse genotyping*****Gene name****IL-33*

forward: GAGAGATCAAATGAGGCC

forward mutant: GGTCGCTACCATTACCAG

reverse: GCTGGAGACCAGACTTGT

*ST2*

forward wild-type: GAAGAGGGCTTCACTCTGTATC

reverse wild-type: GGAGGAGGAGGAGTTGTTAAAG

forward mutant: GATCTCCTGTCATCTCACCTTG

reverse mutant: GCCAACGCTATGTCCTGATA

*K14-IL33*

forward: GGAGGGGGCAAAGTTTTTCAGGGTG

reverse: TTTGCAAGGCGGGACCAGGG
