# Supplementary material
Source: PubMed Central journal article supplement (PMC8013835)

Figure 3A

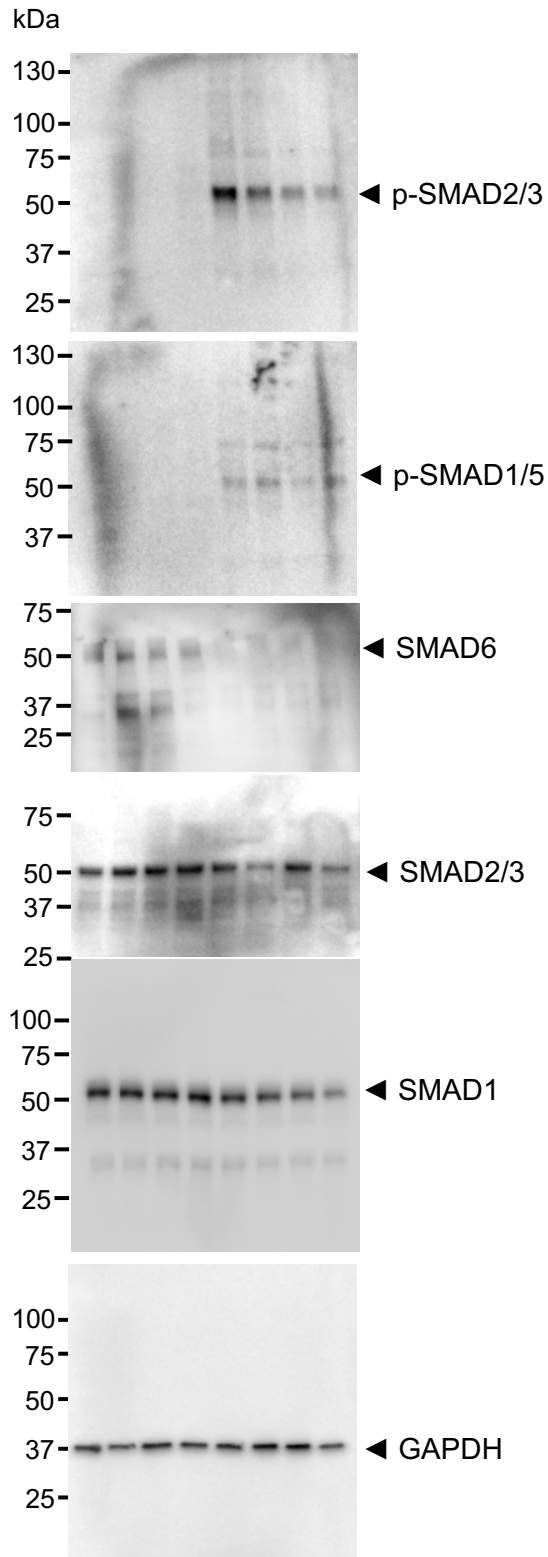

Figure 3D

Main figure

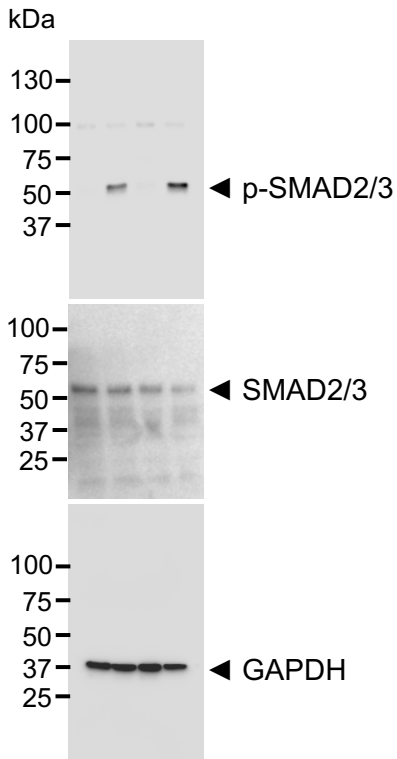

Replicate

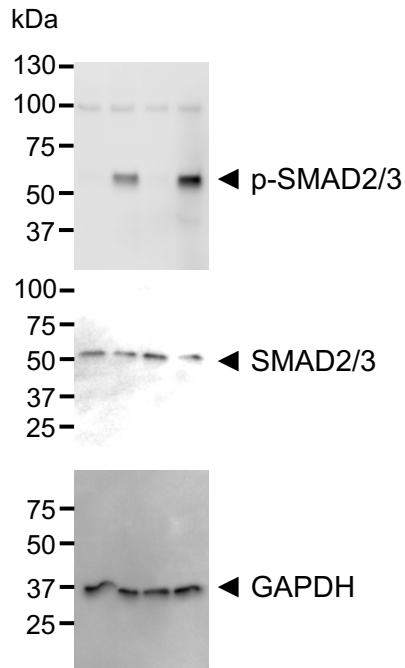

Replicate

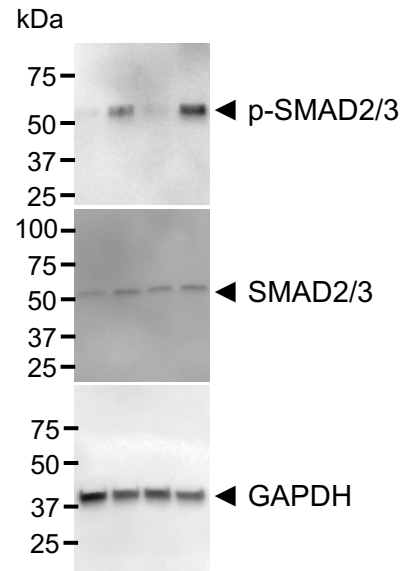

Figure 3E

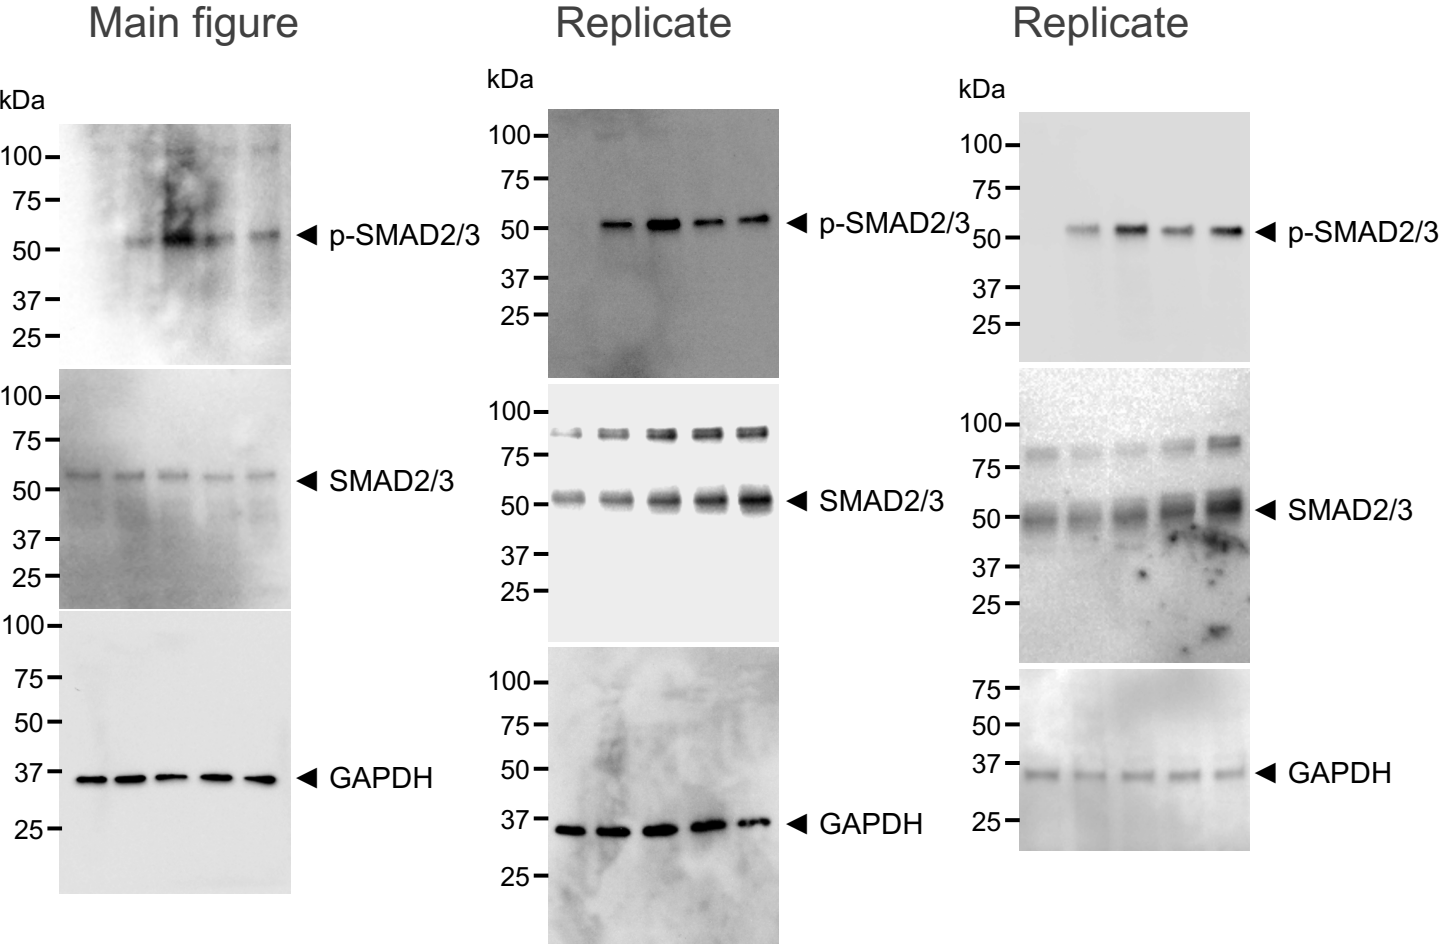

Figure 3F

Main figure

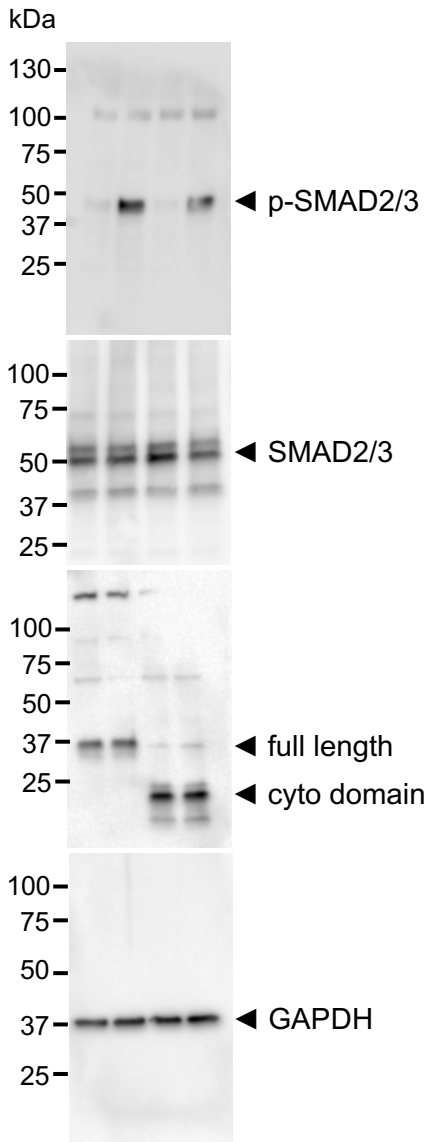

Replicate

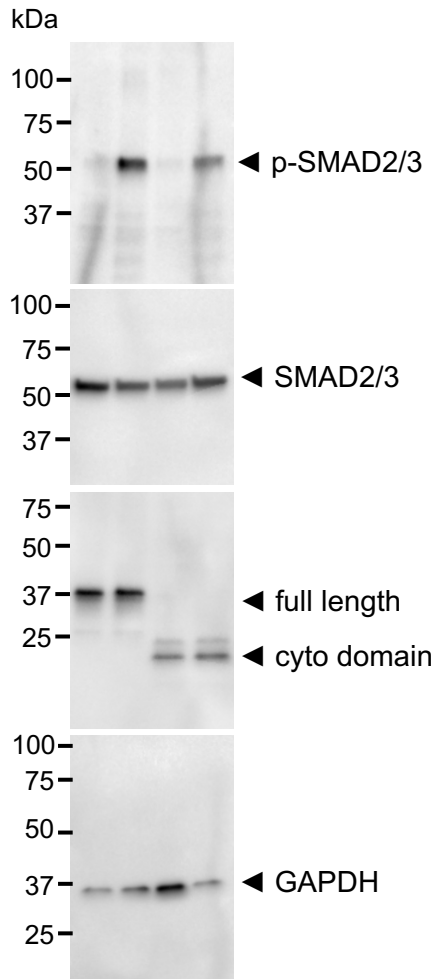

Replicate

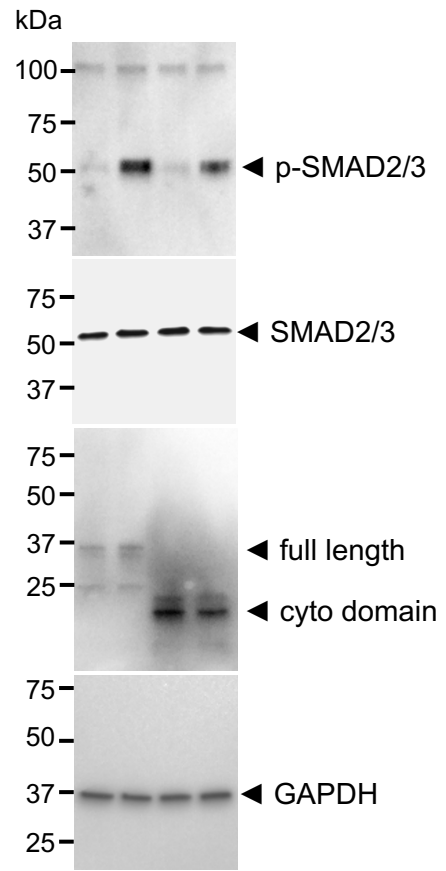

Supplement: EMBJ-40-e106151-s007.pdf [file EMBJ-40-e106151-s007.pdf]
