# Supplementary material
Source: PubMed Central journal article supplement (PMC8013835)

Figure 4I

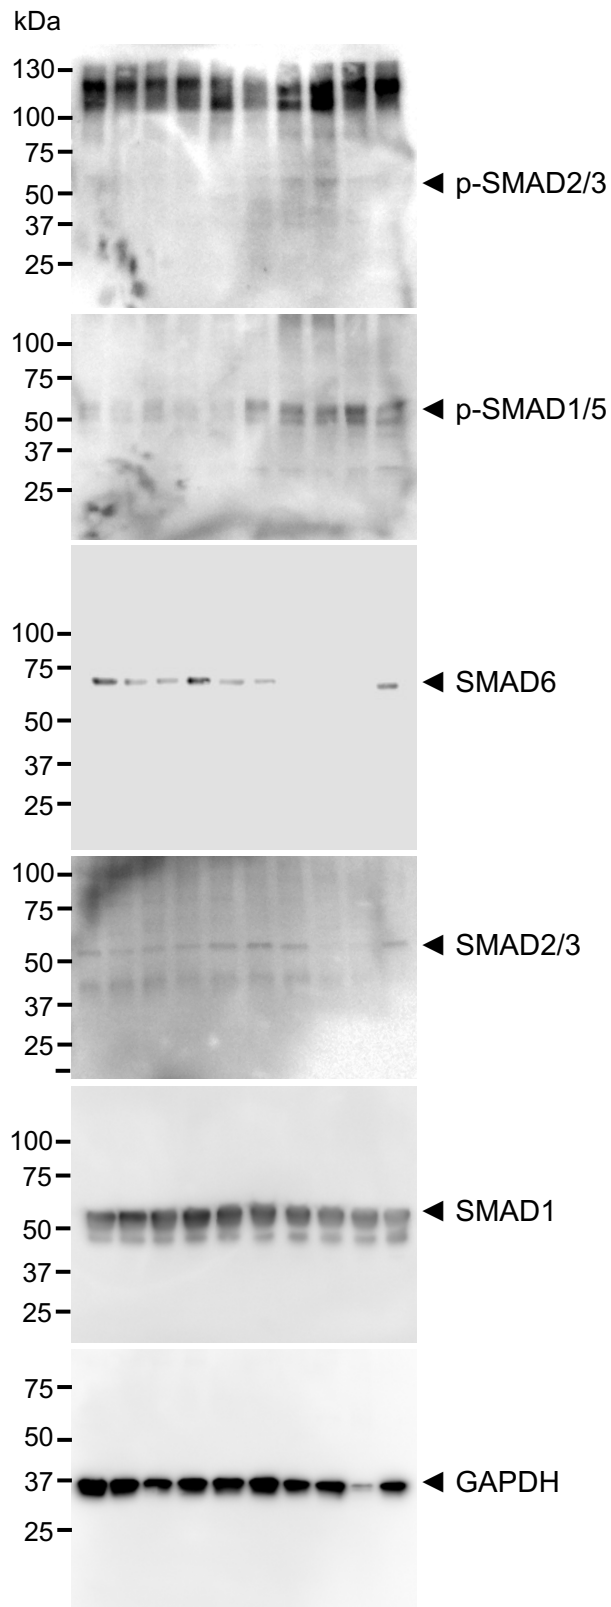

Supplement: EMBJ-40-e106151-s001.pdf [file EMBJ-40-e106151-s001.pdf]

Figure 2F

Main figure

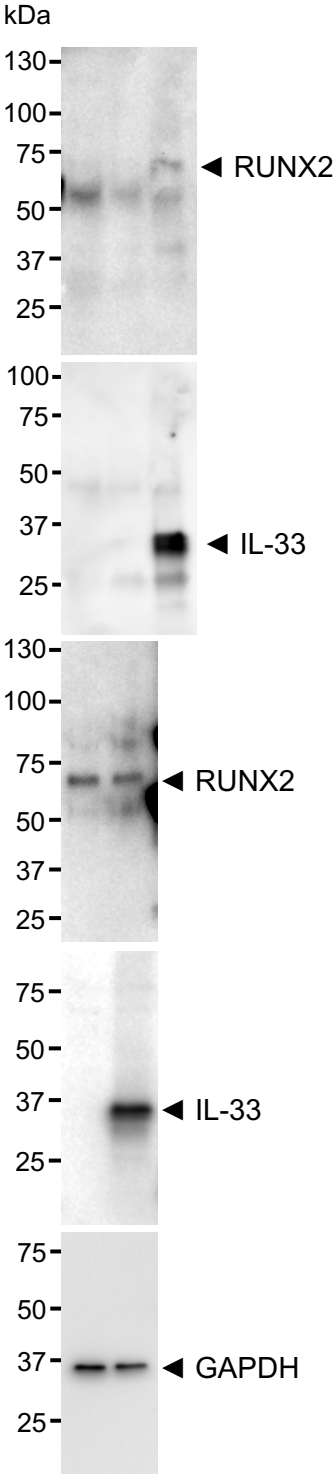

Replicate

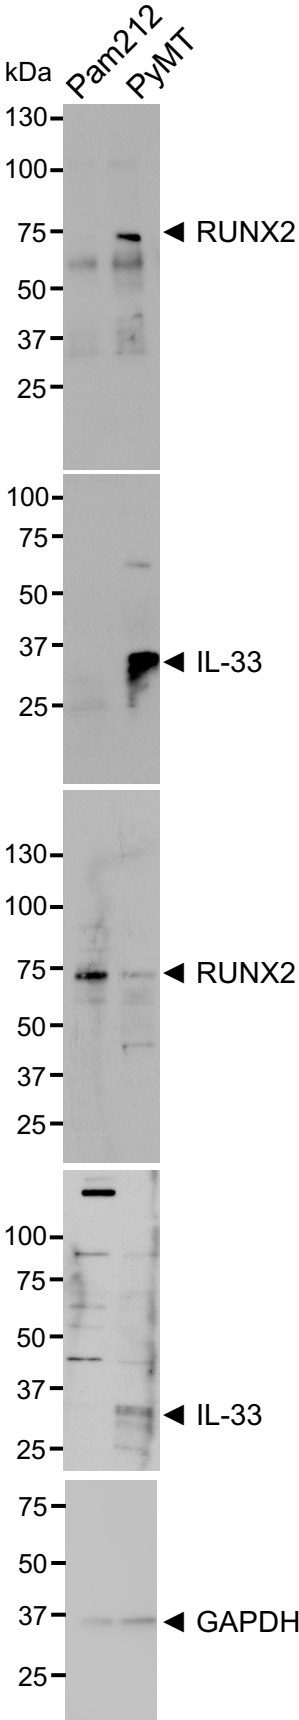

Figure 2G

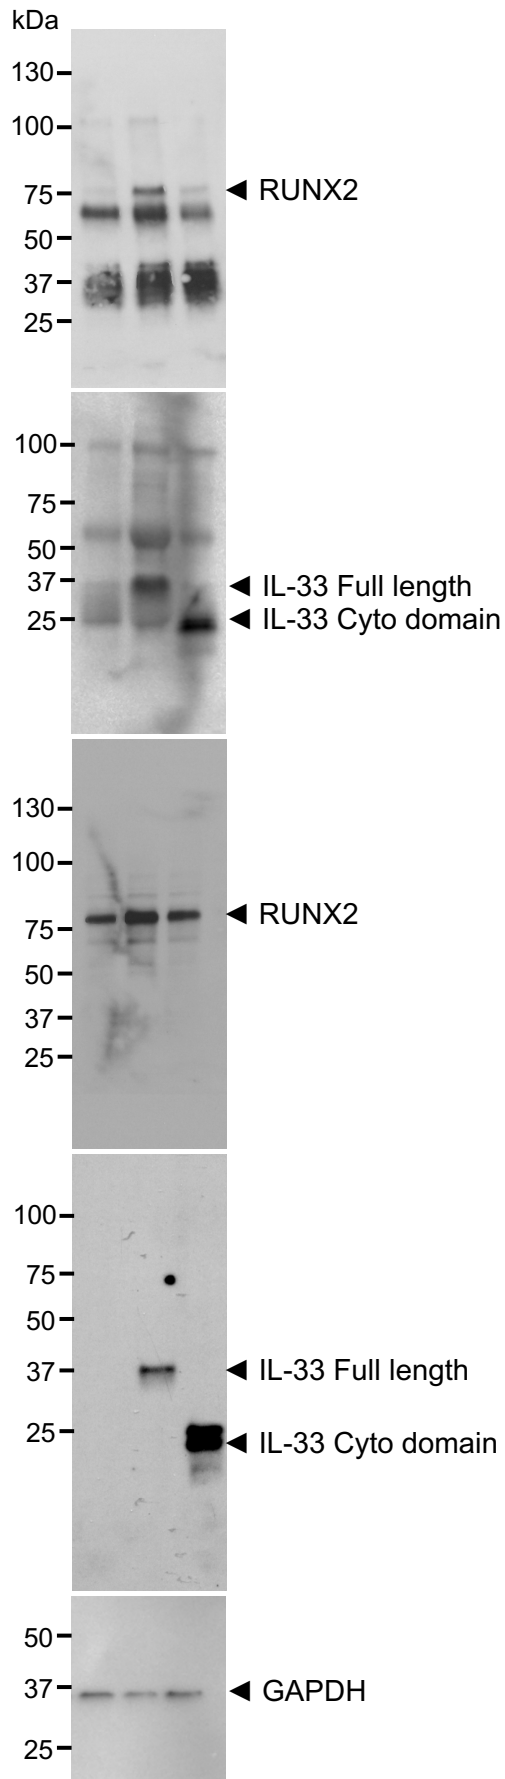

Supplement: EMBJ-40-e106151-s003.pdf [file EMBJ-40-e106151-s003.pdf]

Figure 5C

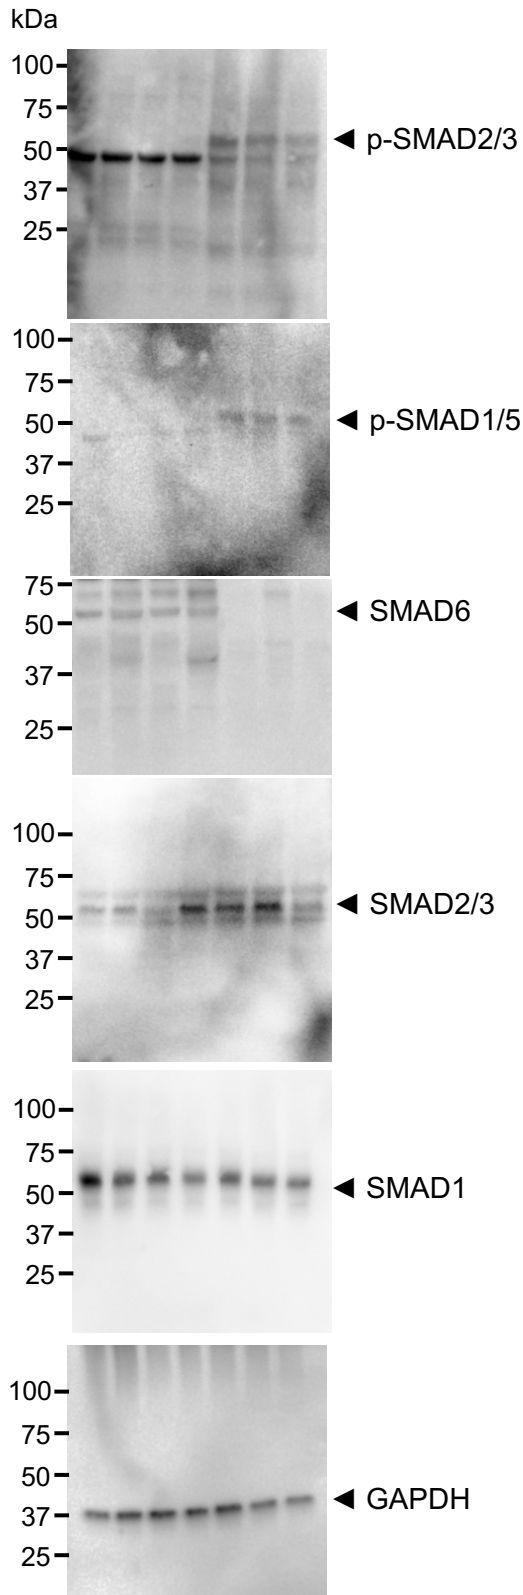

Supplement: EMBJ-40-e106151-s005.pdf [file EMBJ-40-e106151-s005.pdf]
